# Supplementary material
Source: Springer Nature journal article supplement (https://www.springermedizin.de/resource/supplementary/13012_2008_156_MOESM1_ESM.pdf/9629358)

**ATTITUDE**

(Behavioural beliefs weighted by Outcome evaluations)

**SUBJECTIVE NORM**

(Normative beliefs weighted by Motivation to comply)

**PERCEIVED BEHAVIOURAL CONTROL**

(Control beliefs weighted by Influence of control beliefs)

**BEHAVIOURAL INTENTION****BEHAVIOUR**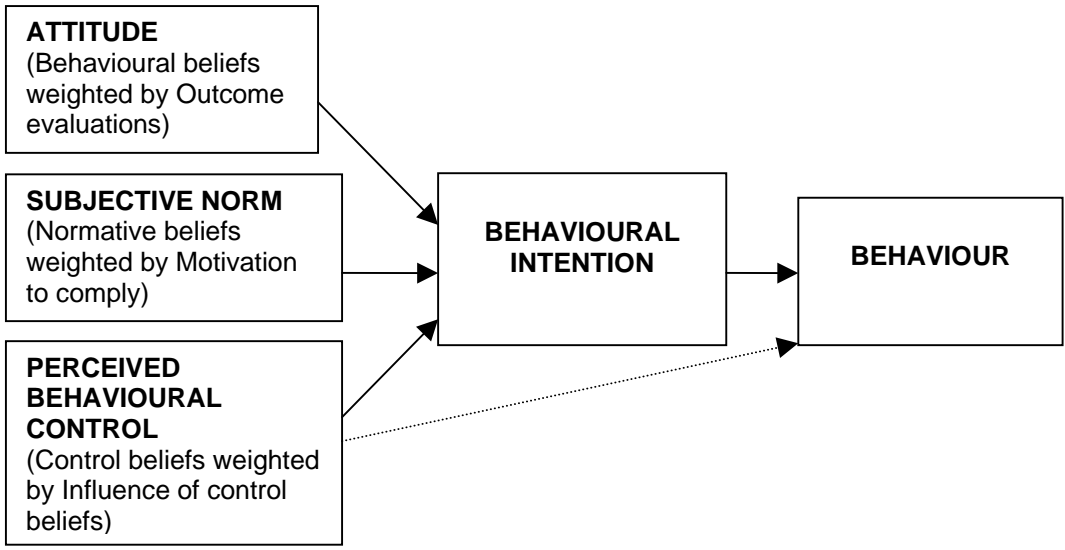

Supplement: MOESM1 [file 9629358]
